# Supplementary material for: A Method for Quantifying Cervical Sagittal Morphology Using the Cervical Sagittal Triangle Area Coefficient
Source: Research Square preprint supplement (doi:10.21203/rs.3.rs-579200/v2), 2021-07-27
Supplement: Supplementary file 1 [file 4864ad79e88e5d7ee6f0286d.xlsx]

## Sheet: Sheet1
Black for Group A Red for Group B
No.	Sex	Age (year)	Weight (kg)	Height (cm)	Neck or Shoulder Pain (Y/N)	Arm Pain (Y/N)	Myelppthy-Related Symptoms (Y/N)	Sympathetic or VA-Related Symptoms (Y/N)	C2-7 Cobb Angle (degree)--from Measurer-1	C2-7 Cobb Angle (degree)--from Measurer-2	C2-7 Cobb Angle (degree)--from Measurer-3	C2-7 Cobb Angle (degree)--from Measurer-4	C2-7 Cobb Angle (degree)--from Measurer-5	Mean Value of C2-7 Cobb Angle from Measurer-1 to -5 (degree)	STD of C2-7 Cobb Angle from Measurer-1 to -5 (degree)	Dispersion Coefficient of C2-7 Cobb Angle	C2-7 ROM with Cobb Angle Method (degree)			C1-APD	Area Coefficient of Cervical Sagittal Triangle--from Measurer-1								C1-APD	Area Coefficient of Cervical Sagittal Triangle--from Measurer-2								C1-APD	Area Coefficient of Cervical Sagittal Triangle--from Measurer-3								C1-APD	Area Coefficient of Cervical Sagittal Triangle--from Measurer-4
																					Method-1		Method-2		Method-3		Method-4			Method-1		Method-2		Method-3		Method-4			Method-1		Method-2		Method-3		Method-4			Method-1
																	Flexion	Extension	ROM		Area	Area Coefficient	Area	Area Coefficient	Area	Area Coefficient	Area	Area Coefficient		Area	Area Coefficient	Area	Area Coefficient	Area	Area Coefficient	Area	Area Coefficient		Area	Area Coefficient	Area	Area Coefficient	Area	Area Coefficient	Area	Area Coefficient		Area	Area Coefficient
1	Male	43	79	172	N	Y	Y	Y	6.52	5.95	7.44	7.02	7.95	6.976	0.696638	0.099862	-31.38	35.45	66.83	156.82	1412	0.0574158	364	0.0148013	6489	0.263861	4803	0.195303	154.88	1408	0.0586965	354	0.0147575	6219	0.259257	4760	0.198434	156.192	1444	0.0591902	355	0.0145516	6389	0.261888	4705	0.19286	154.323	1333	0.0559717
2	Female	72	64	151	N	Y	N	N	21.1	18.95	22.13	23.19	23.25	21.724	1.59544	0.0734413	-19.17	43.57	62.74	175	2774	0.0905796	2798	0.0913633	10735	0.350531	7362	0.240392	177.13	2805	0.0894023	2833	0.0902947	10695	0.340876	7294	0.232478	177.838	2991	0.094573	2848	0.0900515	11023	0.348538	7408	0.234235	177.782	2885	0.0912789
3	Female	58	60	163	Y	N	Y	N	13.2	11.09	14.54	16.17	10.98	13.196	1.99985	0.151549	-26.07	37.12	63.19	211.142	1601	0.0359122	1793	0.040219	9990	0.224087	6481	0.145376	213.405	1645	0.0361207	1832	0.0402269	10015	0.219908	6514	0.143034	208.329	1558	0.0358978	1667	0.0384093	9818	0.226216	6324	0.145711	210.133	1677	0.0379791
4	Female	44	53	151	Y	N	N	Y	4.62	3.92	2.95	4.04	4.99	4.104	0.695833	0.16955	-16.73	37.15	53.88	163.487	212	0.00793176	416	0.0155642	5026	0.188043	3511	0.13136	165.33	221	0.00808517	432	0.0158045	5188	0.1898	3603	0.131814	165.082	233	0.00854981	423	0.0155218	5122	0.187949	3671	0.134705	160.293	155	0.00603257
5	Male	67	64	171	N	N	N	N	20.43	18.55	17.55	22.33	21.95	20.162	1.86494	0.092498	-13.62	36.7	50.32	141.59	1906	0.0950731	1398	0.0697336	6793	0.338841	4640	0.231448	138.853	1759	0.0912337	1203	0.0623958	6133	0.318099	4123	0.213847	142.988	2005	0.0980653	1413	0.0691103	6879	0.336454	4732	0.231444	145.859	2033	0.0955589
6	Male	44	65	170	N	N	N	N	9.74	7,90	7.55	10.02	9.13	9.11	0.956426	0.104986	-19.2	32.15	51.35	211.74	378	0.00843113	-421	-0.00939023	13732	0.306287	9689	0.216109	213.48	432	0.00947915	-533	-0.0116953	14994	0.329005	9713	0.213127	210.488	401	0.00905086	-402	-0.00907343	13884	0.313372	9878	0.222954	208.733	311	0.00713803
7	Male	38	63	170	N	N	Y	N	15.72	14.63	17.12	15.51	12.99	15.194	1.36101	0.0895754	-14.93	56.67	71.6	232	3854	0.0716037	2662	0.0494575	16591	0.308245	11528	0.21418	227.94	3499	0.0673446	2423	0.046635	15994	0.307834	11092	0.213486	232.141	3904	0.0724446	2661	0.0493789	16488	0.30596	11533	0.214012	229.995	3919	0.0740864
8	Female	73	55	164	N	N	Y	N	9.97	6.58	8.87	6.27	5.27	7.392	1.74652	0.236272	-11.25	45.35	56.6	186.12	148	0.00427244	1241	0.035825	9989	0.288361	6428	0.185562	188.37	155	0.00436826	1320	0.0372006	10181	0.286924	6672	0.188032	188.343	157	0.00442589	1294	0.0364784	10023	0.282552	6561	0.184957	188.858	199	0.00557933
9	Male	42	75	178	Y	Y	Y	Y	-4.97	-2.94	-2.57	-1.32	-0.2	-2.4	1.60822	0.67009	-28.9	16.23	45.13	170.1	-357	-0.0123384	-587	-0.0202875	5470	0.189051	4396	0.151932	167.15	-303	-0.010845	-533	-0.0190772	5321	0.19045	4291	0.153584	172.381	-409	-0.013764	-622	-0.020932	5541	0.18647	4437	0.149317	172.384	-402	-0.013528
10	Male	31	73	171	N	N	N	Y	6.87	5.54	5.45	4.29	6.23	5.676	0.862916	0.152029	-20.2	19.6	39.8	203.81	899	0.0216426	2063	0.0496647	9332	0.224659	7559	0.181976	205.33	939	0.0222721	2105	0.0499284	9832	0.233205	7878	0.186858	202.773	875	0.0212808	1929	0.046915	9193	0.223582	7418	0.180412	205.991	1033	0.0243447
11	Female	69	53	150	N	N	Y	Y	13.42	13.09	14.24	12.18	10.75	12.736	1.19235	0.0936206	-26.25	33.45	59.7	204.92	1547	0.0368402	1418	0.0337682	12213	0.29084	7628	0.181653	200.18	1485	0.0370583	1527	0.0381064	13091	0.326687	7529	0.187887	203.185	1651	0.0399911	1423	0.0344684	12238	0.296433	7718	0.186948	200.283	1442	0.0359482
12	Female	65	51	161	N	Y	N	N	24.1	26.94	22.15	23.15	22.18	23.704	1.77048	0.074691	-20.9	49.02	69.92	205.72	3747	0.0885382	3145	0.0743135	13383	0.316228	9032	0.213418	207.99	3888	0.0898755	3235	0.0747807	13919	0.321753	9313	0.21528	206.554	3818	0.0894888	3019	0.0707613	13557	0.317758	9133	0.214065	207.554	4023	0.0933873
13	Male	43	66	175	N	Y	N	N	28.87	24.91	25.93	21.34	22.55	24.72	2.6403	0.106808	-4.05	39.28	43.33	147.472	1364	0.0627184	1268	0.0583042	6165	0.283474	3400	0.156336	150.231	1414	0.0626513	1397	0.0618981	6248	0.276836	3492	0.154723	151.338	1459	0.0637029	1332	0.0581578	6275	0.273979	3518	0.153603	150.482	1442	0.063679
14	Female	51	62	153	Y	Y	N	N	18.53	15.33	20.03	21.39	24.29	19.914	2.97556	0.149421	-38.23	27.2	65.43	162.144	582	0.0221371	438	0.0166599	5770	0.219469	3525	0.134078	164.392	605	0.0223869	423	0.0156523	5932	0.219503	3429	0.126884	163.092	588	0.0221061	440	0.016542	5818	0.21873	3612	0.135795	165.582	779	0.0284126
15	Male	44	74	163	N	N	Y	N	15.97	16.03	16.88	16.42	14.23	15.906	0.899035	0.0565218	14.02	26.3	12.28	202.527	873	0.0212838	737	0.0179681	8204	0.200014	5238	0.127703	203.133	891	0.0215932	757	0.0183457	8103	0.196374	5523	0.133849	205.19	901	0.0213999	811	0.0192623	8333	0.19792	5259	0.124908	201.231	841	0.0207686
16	Male	54	68	162	Y	N	Y	N	11.45	14.43	9.44	7.92	6.23	9.894	2.8469	0.28774	-20.8	28.4	49.2	184.228	2170	0.0639364	622	0.0183265	12351	0.363907	7474	0.220212	185.372	2238	0.0651286	794	0.0231064	13293	0.386843	7765	0.225971	185.119	2211	0.0645189	631	0.0184131	12414	0.362251	7511	0.219177	185.123	2384	0.0695642
17	Female	70	53	161	N	N	N	N	16.15	12.69	15.13	14.92	11.33	14.044	1.76528	0.125697	-19.5	25.59	45.09	125.142	641	0.040931	543	0.0346732	5501	0.351265	3675	0.234667	122.397	633	0.0422534	522	0.0348441	5629	0.375742	3783	0.252519	126.192	655	0.0411318	519	0.0325915	5433	0.341174	3709	0.232913	126.394	784	0.0490753
18	Male	50	61	170	N	N	Y	N	13.2	10.08	10.93	12.13	10.62	11.392	1.12644	0.0988795	-27.8	44.67	72.47	208.837	774	0.017747	2301	0.0527596	10549	0.241878	6519	0.149474	213.883	813	0.0177721	2493	0.0544966	11003	0.240524	6673	0.145871	207.134	791	0.0184363	2388	0.0556585	11084	0.258341	6608	0.154017	205.413	765	0.0181303
19	Female	44	60	156	N	N	N	N	17.17	16.18	14.55	12.44	10.73	14.214	2.36649	0.16649	-26.25	35.42	61.67	179.011	1094	0.0341396	492	0.0153534	6595	0.205805	4489	0.140085	181.293	1132	0.0344417	574	0.0174642	6728	0.204703	4523	0.137615	180.001	1132	0.0349379	501	0.0154628	6555	0.202313	4590	0.141665	175.432	883	0.0286908
20	Male	57	85	163	Y	Y	N	Y	0.28	-0.55	1.37	2.88	3.94	1.584	1.64502	1.03853	-22.37	8.41	30.78	191.039	-691	-0.0189336	-481	-0.0131796	7385	0.202351	4828	0.132289	188.296	-613	-0.0172893	-399	-0.0112536	7193	0.202875	4682	0.132053	192.133	-713	-0.0193146	-503	-0.0136259	7553	0.204605	5029	0.136232	191.933	-881	-0.0239153
21	Male	57	65	168	Y	Y	N	N	15.22	13.08	14.29	16.23	15.23	14.81	1.06058	0.0716127	10.13	18.58	8.45	189.56	968	0.026939	1992	0.0554365	9472	0.263602	6509	0.181143	187.382	849	0.0241798	1782	0.0507519	9321	0.265465	6142	0.174926	191.239	1005	0.0274798	1988	0.054358	9515	0.260169	6498	0.177675	190.02	993	0.0275011
22	Female	45	63	159	N	N	N	N	35.88	34.19	34.22	31.07	32.37	33.546	1.66314	0.0495778	-12.87	40.92	53.79	209.848	3378	0.0767096	3941	0.0894946	13898	0.315604	8282	0.188073	207.31	3193	0.0742948	3455	0.080391	13223	0.307673	8093	0.188308	211.333	3417	0.0765086	4008	0.0897414	14402	0.322469	8325	0.186402	207.784	3219	0.0745584
23	Male	46	64	173	Y	Y	Y	N	14.97	16.83	14.23	12.77	11.38	14.036	1.86406	0.132805	-31.07	33.55	64.62	154.688	1072	0.0448004	901	0.037654	7212	0.301399	4629	0.193452	151.329	988	0.0431432	788	0.0344098	7057	0.30816	4545	0.198468	151.296	998	0.0435989	789	0.0344685	7003	0.305935	4513	0.197156	155.941	1123	0.0461806
24	Male	54	81	165	N	N	Y	N	38.52	32.95	39.12	40.08	37.24	37.582	2.4923	0.0663162	-13.47	51.07	64.54	174.416	4240	0.139378	2332	0.0766577	12729	0.418429	7969	0.261958	177.959	4560	0.143988	2492	0.0786879	13295	0.419806	8132	0.256778	175.585	4323	0.14022	2441	0.0791759	13008	0.421925	8057	0.261336	175.929	4331	0.139931
25	Male	38	78	182	Y	N	N	N	18.5	19.32	14.93	12.39	11.59	15.346	3.12278	0.203492	-28.35	38.35	66.7	164.438	2230	0.0824709	1698	0.0627962	9951	0.368012	6288	0.232546	165.943	2444	0.0887531	1793	0.0651122	9479	0.344227	6563	0.238333	164.112	2233	0.0829102	1705	0.0633058	10092	0.374711	6339	0.235364	164.781	2251	0.0829013
26	Male	40	68	168	N	N	Y	N	25.62	28.91	24.25	20.17	21.37	24.064	3.10999	0.129238	1.2	42.45	41.25	161.756	1616	0.0617619	1190	0.0454806	9514	0.363615	6346	0.242538	160.293	1533	0.0596641	1183	0.0460422	9428	0.366936	6210	0.241692	162.934	1673	0.0630191	1202	0.0452774	9617	0.362256	6405	0.241266	163.223	1700	0.0638096
27	Male	45	68	164	Y	N	N	Y	-2.12	-1.03	-2.98	-1.44	-2.33	-1.98	0.68355	0.345227	-38.35	22.6	60.95	173.761	194	0.00642535	303	0.0100355	5422	0.179579	3980	0.131819	171.545	188	0.00638854	274	0.00931096	5154	0.175141	3789	0.128756	174.882	205	0.00670291	332	0.0108555	5456	0.178396	4092	0.133797	175.883	232	0.00749964
28	Female	43	64	148	Y	N	N	Y	7.2	5.32	5.57	4.97	4.23	5.458	0.981048	0.179745	-22.22	39.1	61.32	170.95	576	0.0197099	-50	-0.00171093	5879	0.201171	4093	0.140057	173.239	592	0.0197256	-139	-0.00463152	6029	0.200888	4141	0.137979	172.244	601	0.0202575	-81	-0.00273021	6038	0.203519	4291	0.144634	171.339	605	0.0206083
29	Female	40	48	165	Y	N	Y	Y	4.08	2.55	2.99	3.79	3.99	3.48	0.603523	0.173426	-34.15	26.8	60.95	175.328	-448	-0.0145739	-559	-0.0181848	4764	0.154978	3716	0.120885	172.391	-392	-0.0131904	-459	-0.0154448	4492	0.151151	3592	0.120867	173.323	-399	-0.0132819	-502	-0.0167106	4650	0.154789	3618	0.120436	178.199	-565	-0.0177925
30	Male	43	72	182	Y	N	N	Y	9.52	8.13	5.67	4.11	2.13	5.912	2.66633	0.451002	-36.03	32.52	68.55	171.397	-129	-0.0043912	-81	-0.00275727	7087	0.241244	5942	0.202268	170.923	-188	-0.00643512	-59	-0.00201953	7592	0.259869	5832	0.199626	172.833	-133	-0.00445244	-91	-0.00304641	7173	0.240131	6002	0.200929	172.394	-144	-0.00484527
31	Male	46	79	163	Y	N	Y	Y	16.62	14.55	12.97	13.05	10.92	13.622	1.89221	0.138908	-14.05	34.88	48.93	161.617	1108	0.0424195	736	0.0281776	7565	0.289624	5478	0.209724	160.923	1009	0.0389632	756	0.0291935	7237	0.279462	5248	0.202655	162.382	1199	0.0454719	804	0.0304916	7676	0.291111	5445	0.206501	164.991	1203	0.0441921
32	Male	52	79	168	Y	N	Y	N	8.35	7.42	5.29	4.2	2.95	5.642	1.99723	0.353994	-38.4	33.88	72.28	224.878	728	0.0143959	1098	0.0217124	9349	0.184872	7249	0.143346	225.338	757	0.0149083	1121	0.0220768	9593	0.188923	7492	0.147546	223.712	705	0.0140867	1003	0.0200411	9292	0.185665	7201	0.143885	222.188	566	0.011465
33	Female	54	50	163	Y	N	Y	Y	9.3	8.21	12.13	14.54	11.38	11.112	2.2165	0.199469	-20.17	32.9	53.07	201.48	922	0.0227126	906	0.0223185	6581	0.162117	5149	0.126841	202.323	941	0.0229879	955	0.0233299	6239	0.152414	5291	0.129255	208.384	1004	0.0231209	912	0.0210023	6672	0.153648	5254	0.120993	203.488	1102	0.0266136
34	Female	51	64	153	N	Y	N	Y	9.91	12.22	6.92	8.88	6.23	8.832	2.14798	0.243204	-26.92	22.45	49.37	220.844	4	8.20141e-05	838	0.017182	8019	0.164418	6266	0.128475	223.031	55	0.00110569	938	0.018857	8323	0.167321	6491	0.130491	223.133	15	0.000301275	993	0.0199444	8218	0.165059	6403	0.128604	221.023	22	0.000450347
35	Male	59	69	175	N	N	Y	N	35.1	32.15	36.66	34.92	30.18	33.802	2.32168	0.0686846	20.38	39.1	18.72	183.611	3560	0.105597	3294	0.0977071	10934	0.324326	8042	0.238543	182.428	3329	0.10003	3091	0.0928787	8998	0.270373	7321	0.219982	181.025	3340	0.101922	3219	0.0982299	10550	0.32194	7913	0.24147	185.239	3999	0.116543
36	Male	40	61	167	N	N	Y	Y	0.88	0.02	1.28	0.21	2.38	0.954	0.845118	0.885868	-15.88	32.82	48.7	171.493	-388	-0.0131929	-462	-0.015709	4525	0.15386	3376	0.114791	175.329	-495	-0.0161027	-511	-0.0166232	4747	0.154423	3521	0.11454	172.388	-405	-0.0136283	-503	-0.016926	4599	0.154757	3471	0.116799	173.293	-492	-0.0163834
37	Female	49	61	157	N	N	N	N	29.05	25.84	31.15	30.52	27.92	28.896	1.89912	0.0657227	-8.48	38.63	47.11	212.897	3037	0.0670048	3461	0.0763594	11368	0.25081	8679	0.191483	211.755	2932	0.0653878	3321	0.074063	10932	0.243799	8521	0.19003	210.293	2988	0.0675664	3302	0.0746668	11322	0.25602	8585	0.194129	211.488	2881	0.0644127
38	Female	41	62	149	N	Y	N	Y	16.33	14.19	17.04	13.74	10.55	14.37	2.28001	0.158664	-31.02	26.25	57.27	140.236	1352	0.0687476	981	0.0498827	5014	0.254956	3750	0.190683	144.239	1523	0.0732039	1093	0.0525357	5523	0.265466	3928	0.188802	142.382	1442	0.0711304	1032	0.0509061	5523	0.272436	3888	0.191786	141.229	1299	0.065127
39	Female	53	59	157	N	Y	N	Y	27.5	24.17	25.3	22.97	21.38	24.264	2.07585	0.0855526	-25.05	43.83	68.88	146.755	3033	0.140827	2664	0.123694	7706	0.357802	5405	0.250963	146.755	3033	0.140827	2664	0.123694	7706	0.357802	5405	0.250963	147.485	3132	0.143988	2818	0.129552	7805	0.35882	5523	0.25391	145.223	2991	0.141823
40	Female	51	58	151	Y	N	Y	N	18.72	16.23	20.05	22.23	20.68	19.582	2.02067	0.10319	-9.68	31	40.68	229.532	4350	0.0825663	3000	0.0569423	15198	0.28847	11417	0.216703	225.235	4040	0.079636	2891	0.0569871	14581	0.287419	10223	0.201515	225.443	4140	0.0814567	2833	0.0557408	14992	0.294976	12005	0.236205	228.858	4291	0.0819269
41	Male	49	71	169	Y	Y	N	N	33.53	29.33	31.15	32.29	30.92	31.444	1.40692	0.0447437	-2.47	51.92	54.39	162.542	2187	0.0827785	1728	0.0654052	7115	0.269305	4966	0.187964	161.222	2099	0.080754	1624	0.0624795	7233	0.278272	5038	0.193825	166.454	2284	0.0824342	1921	0.0693328	7889	0.28473	5451	0.196738	160.151	2008	0.0782897
42	Female	39	55	148	Y	N	N	Y	16.08	14.75	14.66	12.97	10.93	13.878	1.77403	0.12783	-19.37	52.63	72	146.328	731	0.0341399	1089	0.0508596	4341	0.202738	3288	0.15356	150.332	893	0.0395138	1123	0.0496909	4452	0.196994	3395	0.150223	145.338	791	0.0374471	1102	0.0521703	4451	0.210717	3418	0.161813	142.211	788	0.0389637
43	Male	52	78	176	N	N	Y	N	12.52	10.08	10.92	14.23	13.52	12.254	1.5546	0.126865	-20.15	35.82	55.97	187.385	1597	0.0454816	1012	0.0288211	7967	0.226895	6686	0.190413	184.133	1502	0.0443003	989	0.0291698	7565	0.223124	6423	0.189441	189.959	1678	0.0465021	1122	0.0310938	8056	0.223254	6919	0.191745	185.185	1660	0.0484057
44	Female	48	48	151	Y	Y	N	N	29.82	27.09	27.34	25.32	24.2	26.754	1.9202	0.0717726	-5.47	35.93	41.4	164.615	1766	0.0651706	1724	0.0636207	6806	0.251162	5438	0.200678	165.122	1877	0.0688421	1822	0.0668249	6732	0.246907	5219	0.191416	163.285	1711	0.0641738	1655	0.0620734	6670	0.250169	5239	0.196497	164.588	1881	0.0694372
45	Male	37	78	165	N	Y	Y	N	26.13	23.44	24.52	22.13	21.6	23.564	1.63874	0.0695442	-7.38	44.23	51.61	128.082	1221	0.0744285	1330	0.0810728	5335	0.325206	4104	0.250168	126.584	1133	0.0707086	1193	0.0744531	5145	0.321091	3928	0.24514	130.05	1281	0.0757405	1369	0.0809436	5542	0.327677	4293	0.253828	129.192	1299	0.0778284
46	Male	40	76	172	Y	Y	N	Y	5.97	6.88	4.51	6.33	5.39	5.816	0.81328	0.139835	-17.48	15.57	33.05	174.957	-94	-0.0030709	-97	-0.0031689	4979	0.16266	4282	0.139889	171.883	-18	-0.000609266	-33	-0.00111699	5021	0.169951	4198	0.142094	178.793	-103	-0.00322208	-113	-0.0035349	5038	0.1576	4433	0.138675	175.751	-111	-0.00359358
47	Female	62	65	155	Y	N	Y	N	32.6	29.54	32.21	30.85	27.94	30.628	1.72336	0.0562675	2.57	43.68	41.11	205.718	6063	0.143266	5524	0.13053	17082	0.40364	12858	0.303829	201.385	5789	0.142741	5263	0.129771	16883	0.416289	12523	0.308784	206.199	6193	0.145656	5720	0.134531	17783	0.418246	13092	0.307916	206.778	6163	0.14414
48	Male	56	63	173	Y	N	Y	N	26.22	28.13	25.44	23.49	21.93	25.042	2.15291	0.0859719	3.45	49.15	45.7	206.865	4429	0.103498	3912	0.0914165	12949	0.302595	10108	0.236206	202	4218	0.103372	3817	0.0935448	12421	0.304406	9932	0.243408	207.339	4539	0.105584	4018	0.0934648	13031	0.303121	11992	0.278952	201.332	4199	0.103591
49	Male	44	77	165	Y	N	N	N	20.82	18.96	18.19	19.32	17.29	18.916	1.17994	0.062378	-17.13	28.68	45.81	240.651	2325	0.0401465	1496	0.0258319	12206	0.210765	8579	0.148136	245.443	2729	0.0453004	1527	0.0253477	13019	0.216111	8984	0.149131	245.331	2842	0.0472193	1508	0.0250551	12592	0.209214	8781	0.145895	238.884	2225	0.0389902
50	Female	49	49	149	Y	N	Y	N	18.27	16.73	16.24	15.23	13.63	16.02	1.54604	0.0965069	-16.87	39.23	56.1	187.182	2241	0.0639608	1346	0.0384164	9424	0.268972	7042	0.200987	185.232	2029	0.0591357	1201	0.0350035	9283	0.270555	6678	0.194632	184.113	2005	0.0591487	1129	0.0333062	9223	0.272084	7103	0.209543	187.995	2335	0.0660685
51	Male	68	67	164	N	Y	N	N	19.1	17.71	20.37	18.92	16.29	18.478	1.38124	0.0747504	-8.47	28.2	36.67	240.801	1400	0.0241441	325	0.00560489	11015	0.189963	8686	0.149797	234.952	1293	0.0234229	308	0.00557946	12121	0.219574	8521	0.154359	242.993	1561	0.0264372	399	0.00675749	11123	0.18838	8777	0.148648	241.991	1488	0.02541
52	Female	37	51	161	Y	N	N	Y	3.32	2.52	4.33	3.42	2.52	3.222	0.672619	0.208758	-29.1	43.87	72.97	238.321	-1010	-0.0177827	-1118	-0.0196842	7382	0.129972	5383	0.0947763	235.835	-882	-0.0158581	-1002	-0.0180157	7023	0.126272	5323	0.0957062	242.382	-1329	-0.0226216	-1227	-0.0208854	8005	0.136258	5657	0.0962909	235.383	-884	-0.0159552
53	Male	24	71	162	Y	N	Y	N	8.25	6.17	7.53	6.23	5.43	6.722	1.02016	0.151765	-28.43	18.27	46.7	156.589	1064	0.0433929	518	0.0211255	5694	0.232218	4311	0.175815	155.932	994	0.0408805	487	0.020029	5102	0.209831	4088	0.168128	157.982	-1102	-0.0441536	533	0.0213556	5848	0.234311	4541	0.181943	154.875	996	0.0415238
54	Male	44	85	163	Y	Y	Y	N	32.97	33.64	33.21	30.19	27.49	31.5	2.34354	0.074398	1.35	42.07	40.72	235.002	4323	0.0782784	2822	0.0510992	17601	0.318709	11774	0.213197	231.942	4081	0.0758591	2793	0.0519173	16921	0.314534	11039	0.205197	240.192	4551	0.0788842	3017	0.0522948	17881	0.309938	12031	0.208538	232.911	4221	0.07781
55	Female	40	53	154	Y	Y	Y	N	-10.87	-7.56	-8.22	-6.23	-5.33	-7.642	1.90262	0.248969	-27.2	-3.12	24.08	179.174	-1865	-0.0580937	-1526	-0.047534	3312	0.103167	3218	0.100239	177.252	-1762	-0.056082	-1442	-0.0458969	3281	0.10443	3094	0.0984777	181.293	-1993	-0.0606381	-1589	-0.0483461	3513	0.106885	3395	0.103295	181.992	-2004	-0.0605053
56	Male	45	79	167	Y	N	N	N	3	2.31	3.44	2.95	1.93	2.726	0.536977	0.196983	-7.93	13.97	21.9	207.576	969	0.022489	1178	0.0273395	6876	0.159581	5976	0.138694	210.223	1032	0.0233517	1212	0.0274247	6928	0.156764	5841	0.132168	205.183	900	0.0213776	1008	0.023943	6541	0.155368	5599	0.132993	205.183	919	0.0218289
57	Male	44	64	178	Y	N	Y	Y	1	2.97	2.12	0.95	0.234	1.4548	0.968539	0.665754	-20.27	19.67	39.94	170.135	-632	-0.0218338	-231	-0.0079804	4353	0.150384	3728	0.128792	171.233	-654	-0.022305	-309	-0.0105386	4495	0.153304	3929	0.134001	172.388	-705	-0.0237233	-337	-0.0113401	4491	0.151122	3828	0.128812	171.231	-661	-0.0225443
58	Male	47	72	174	Y	N	N	N	19.3	17.54	20.32	18.12	15.29	18.114	1.70748	0.0942633	-15.38	30.68	46.06	210.661	4038	0.0909909	3076	0.0693135	16339	0.368177	12972	0.292307	211.122	4189	0.0939817	3035	0.0680913	16118	0.361613	12877	0.2889	212.993	4143	0.0913239	3392	0.0747696	17007	0.374884	13132	0.289468	211.059	4122	0.0925338
59	Male	62	75	181	N	Y	N	N	8.45	6.43	9.93	8.83	6.23	7.974	1.42904	0.179212	-27.35	27.83	55.18	194.797	2588	0.0682024	1696	0.0446952	8308	0.218943	6876	0.181205	192.384	2371	0.064061	1554	0.0419868	8093	0.218661	6679	0.180457	198.231	2666	0.0678449	1792	0.0456032	8850	0.225216	7002	0.178188	195.961	2777	0.0723164
60	Female	54	58	163	N	N	Y	Y	22.73	24.23	25.79	23.13	20.94	23.364	1.61046	0.0689292	-13.77	42.73	56.5	160.751	925	0.035796	638	0.0246896	6420	0.248444	4573	0.176968	158.823	889	0.0352432	613	0.0243015	6544	0.259428	4429	0.175582	162.331	999	0.0379108	732	0.0277785	6560	0.248944	4710	0.178738	162.313	1005	0.0381469
61	Female	48	64	157	Y	N	N	N	12.3	14.32	13.08	12.58	14.93	13.442	1.0162	0.0755986	-18.95	24.83	43.78	197.975	1924	0.049089	381	0.00972085	8674	0.221309	6363	0.162346	195.774	1842	0.0480595	351	0.00915793	8482	0.221303	6092	0.158946	200.13	2018	0.0503845	409	0.0102117	9902	0.247228	6828	0.170478	195.144	1881	0.0493945
62	Female	48	64	165	Y	N	N	N	9.88	6.29	10.01	9.93	8.58	8.938	1.42553	0.159491	-8.95	33.28	42.23	193.228	1458	0.0390497	1585	0.0424511	8450	0.226317	6342	0.169858	192.925	1249	0.0335572	1492	0.0400859	8381	0.225174	6239	0.167625	194.291	1551	0.0410872	1673	0.0443191	8832	0.233967	6717	0.177939	199.394	1555	0.0391117
63	Male	62	67	180	Y	N	Y	N	8.23	6.55	7.5	6.29	5.23	6.76	1.03096	0.152509	-8.87	18.77	27.64	151.476	1499	0.0653302	670	0.0292003	5014	0.218523	4040	0.176073	150.233	1492	0.0661056	623	0.0276031	4982	0.220736	3842	0.170226	154.332	1508	0.0633125	781	0.0327898	5154	0.216388	4343	0.182338	155.545	1661	0.0686527
64	Male	67	68	182	Y	Y	N	Y	15.32	17.32	12.93	10.52	9.53	13.124	2.90393	0.221269	-6.12	33.43	39.55	180.347	129	0.00396617	391	0.0120215	7372	0.226656	5590	0.171868	178.293	109	0.00342892	338	0.0106328	7542	0.237256	5421	0.170534	183.293	209	0.00622092	432	0.0128585	7575	0.225471	5491	0.163441	178.919	119	0.00371735
65	Female	65	50	149	Y	N	Y	Y	14.08	17.55	15.97	16.23	15.54	15.874	1.12026	0.070572	-3.17	32.3	35.47	155.756	1769	0.0729186	1764	0.0727125	5471	0.225516	4407	0.181658	156.923	1883	0.0764675	1920	0.0779701	5692	0.231149	4592	0.186478	155.085	1705	0.07089	1733	0.0720541	5581	0.232045	4501	0.187141	156.137	1666	0.0683382
66	Male	50	82	163	Y	Y	N	N	31.43	28.84	30.08	28.52	27.59	29.292	1.33335	0.0455192	-14.25	25.52	39.77	187.323	2888	0.0823029	1572	0.0447992	12148	0.346196	8282	0.236022	183.664	2591	0.0768103	1399	0.0414734	11942	0.354021	8092	0.239888	186.222	2666	0.0768773	1481	0.0427064	12005	0.346179	8182	0.235938	185.236	2774	0.0808455
67	Male	54	68	164	N	N	N	N	33.05	31.23	29.15	27.9	29.33	30.132	1.80608	0.059939	-6.12	40.03	46.15	224.66	8506	0.168529	5797	0.114855	23970	0.474916	16852	0.333887	221.329	8023	0.16378	5654	0.115419	22934	0.46817	16321	0.333173	222.93	8301	0.16703	5567	0.112017	22993	0.462656	17004	0.342148	223.193	8435	0.169326
68	Female	68	57	159	N	N	Y	Y	4.67	3.55	3.4	2.99	3.48	3.618	0.560764	0.154993	-24.9	18.48	43.38	170.88	697	0.0238699	292	0.01	6733	0.230582	5092	0.174384	168.333	655	0.0231155	244	0.00861095	6421	0.226602	4839	0.170772	172.331	805	0.0271062	323	0.0108762	7003	0.235807	5151	0.173446	167.988	667	0.0236357
69	Female	58	54	165	Y	N	Y	N	-4.8	-3.18	-2.55	-1.83	-0.37	-2.546	1.46493	0.575385	-30.3	22.88	53.18	181.202	-1488	-0.0453186	-1431	-0.0435827	3606	0.109825	3318	0.101053	184.683	-1552	-0.0455028	-1613	-0.0472912	3981	0.116718	3459	0.101414	183.929	-1602	-0.0473546	-1505	-0.0444873	3888	0.114928	3491	0.103193	183.199	-1592	-0.0474348
70	Male	70	76	161	N	Y	Y	N	24.87	22.57	21.35	20.55	21.39	22.146	1.50681	0.0680396	-8.57	39.12	47.69	226.312	2425	0.0473474	2614	0.0510376	12876	0.2514	9864	0.192592	229.195	2915	0.0554917	1732	0.0329714	13092	0.249227	10032	0.190975	229.188	2554	0.0486225	2718	0.0517447	13291	0.253031	10203	0.194242	221.084	2324	0.0475468
71	Male	65	60	161	N	Y	N	Y	18.05	14.15	15.23	14.29	12.95	14.934	1.7183	0.115059	-25.15	17.1	42.25	140.431	1908	0.0967503	1794	0.0909696	6182	0.313475	4796	0.243194	138.281	1793	0.0937681	1662	0.0869173	6023	0.314984	4655	0.243442	142.333	2092	0.103264	1848	0.0912201	6723	0.331858	4899	0.241822	141.223	2001	0.100331
72	Male	64	71	175	Y	Y	Y	N	3.93	2.18	4.52	3.77	2.13	3.306	0.972555	0.294179	-44.15	19.15	63.3	195	965	0.025378	584	0.0153583	7453	0.196003	6355	0.167127	191.582	882	0.0240303	523	0.0142493	7283	0.198427	6088	0.165869	197.218	1032	0.026533	704	0.0181	7788	0.200232	6522	0.167682	199.293	1008	0.0253791
73	Female	45	53	152	Y	N	N	Y	11.9	7.99	12.93	10.42	9.94	10.636	1.69662	0.159516	-11.67	38.43	50.1	210.345	672	0.0151882	965	0.0218104	4726	0.106814	6182	0.139722	212.593	713	0.0157758	1008	0.022303	4828	0.106824	6243	0.138132	208.366	601	0.0138427	922	0.0212362	4511	0.103901	6173	0.142181	208.931	692	0.0158526
74	Female	45	62	153	N	Y	N	N	13.57	12.13	14.52	12.36	15.03	13.522	1.14545	0.0847101	-22.35	22.25	44.6	145.041	1026	0.0487715	597	0.0283787	4084	0.194135	3354	0.159434	144.234	1109	0.0533085	618	0.0297066	4107	0.197419	3421	0.164444	145.833	1092	0.0513465	581	0.027319	4023	0.189164	3231	0.151924	146.923	1199	0.0555443
75	Female	50	59	153	Y	N	Y	N	9.07	7.44	8.85	6.29	5.48	7.426	1.40058	0.188605	-22.32	32.6	54.92	237.255	786	0.0139634	-674	-0.0119737	8619	0.153118	6909	0.12274	224.245	675	0.0134233	-582	-0.0115738	7713	0.153383	6293	0.125145	238.112	805	0.0141982	-772	-0.0136162	8833	0.155792	7029	0.123974	240.181	881	0.0152721
76	Female	56	59	158	N	N	N	Y	21.8	19.93	20.03	18.32	16.2	19.256	1.88364	0.097821	-6.83	28.53	35.36	170.188	3446	0.118975	734	0.0253418	5757	0.198764	4329	0.149462	171.923	3515	0.118921	801	0.0270997	6013	0.203434	4452	0.150622	171.532	3555	0.120823	881	0.0299423	5832	0.198211	4421	0.150255	171.233	3531	0.120427
77	Female	68	65	160	N	Y	Y	N	26.85	22.95	24.33	20.19	19.39	22.742	2.72724	0.119921	-9.15	32.38	41.53	169.85	2654	0.0919962	1788	0.0619778	10983	0.380706	8286	0.287219	168.235	2551	0.0901317	1723	0.0608769	10032	0.35445	8183	0.289121	170.623	2779	0.0954582	1828	0.0627915	11921	0.409485	8331	0.286169	170.772	2777	0.0952232
78	Female	69	48	149	Y	Y	Y	Y	9.22	12.01	11.13	10.05	7.02	9.886	1.71717	0.173697	-29.37	22.95	52.32	196.573	505	0.013069	-504	-0.0130432	5449	0.141016	4257	0.110168	191.365	421	0.0114963	-399	-0.0108955	4998	0.136481	4018	0.10972	192.984	501	0.0134523	-482	-0.0129421	5229	0.140403	4149	0.111404	195.223	405	0.0106266
79	Female	58	49	155	Y	N	Y	N	17.22	14.95	15.23	12.94	12.29	14.526	1.75773	0.121006	-8.3	33.65	41.95	223.933	2088	0.0416384	1874	0.0373709	12534	0.24995	9232	0.184102	225.183	2193	0.0432481	1932	0.038101	13201	0.260337	9528	0.187902	221.744	1993	0.0405325	1819	0.0369938	12444	0.253079	9191	0.186921	221.335	1994	0.0407029
80	Female	61	52	162	N	N	Y	Y	18.37	16.46	17.77	16.23	14.68	16.702	1.28784	0.077107	-21.52	32.05	53.57	166.09	1204	0.0436455	785	0.0284566	6292	0.228088	5054	0.18321	168.992	1342	0.0469916	913	0.0319697	6623	0.231912	5152	0.180403	168.832	1299	0.0455722	818	0.0286975	6334	0.222213	5123	0.179728	167.883	1255	0.0445277
81	Female	55	49	153	Y	N	Y	Y	7.57	6.95	8.23	7.23	6.44	7.284	0.600586	0.0824528	-18.23	43.88	62.11	189.789	1157	0.0321212	832	0.0230984	9344	0.259412	7712	0.214104	185.123	1039	0.0303176	805	0.0234896	9023	0.263287	7452	0.217446	190.021	1200	0.0332337	885	0.0245098	9595	0.265731	7818	0.216517	185.933	1021	0.0295334
82	Female	62	53	149	N	N	Y	N	11.25	9.18	13.03	12.22	14.3	11.996	1.72709	0.143972	-13.63	21.98	35.61	149.857	1402	0.0624301	168	0.00748092	6325	0.281648	4984	0.221934	145.853	1328	0.0624263	158	0.00742722	6102	0.286841	4545	0.21365	150.388	1442	0.0637586	199	0.00879887	6405	0.2832	5009	0.221475	145.298	1244	0.0589252
83	Male	66	80	182	N	N	N	N	11.28	10.03	9.3	7.62	5.99	8.844	1.8543	0.209667	-21.62	29.45	51.07	165.061	427	0.0156725	642	0.0235638	5493	0.201614	4133	0.151697	161.382	408	0.0156657	641	0.0246121	5432	0.208569	4022	0.15443	166.383	433	0.0156412	701	0.0253221	5592	0.201999	4291	0.155003	164.337	455	0.0168477
84	Male	44	67	169	Y	N	N	N	-3.47	-1.95	-2.55	-1.52	-2.03	-2.304	0.668599	0.29019	-29.78	6.65	36.43	217.672	-224	-0.00472762	-2058	-0.043435	5571	0.117579	5072	0.107047	219.187	-299	-0.0062236	-2218	-0.046167	5823	0.121204	5233	0.108923	220.188	-301	-0.00620839	-2233	-0.0460576	5818	0.120001	6029	0.124353	215.717	-333	-0.00715608
85	Male	48	66	171	N	N	Y	N	5.75	4.97	5.23	4.92	5.39	5.252	0.302417	0.0575813	-23.83	21.37	45.2	182.822	475	0.0142114	1136	0.0339877	7179	0.214787	5150	0.154081	183.291	489	0.0145555	1170	0.034826	7254	0.215921	5189	0.154455	180.992	402	0.0122718	1133	0.0345869	7293	0.222632	5210	0.159045	183.231	488	0.0145352
86	Female	62	52	148	Y	Y	N	N	21.07	23.32	20.07	18.24	16.22	19.784	2.42177	0.122411	-10.62	24.52	35.14	207.425	1776	0.0412782	1214	0.0282161	8467	0.196792	6422	0.149262	210.055	1883	0.0426761	1313	0.0297577	8423	0.190898	6562	0.14872	208.838	1881	0.043129	1305	0.0299221	8399	0.192579	6411	0.146996	210.113	1883	0.0426525
87	Female	74	50	150	Y	N	N	Y	23.03	19.93	21.33	19.54	17.37	20.24	1.88654	0.0932086	-18.88	32.22	51.1	200.142	4360	0.108845	2393	0.0597401	12044	0.300673	8538	0.213147	194.236	4002	0.106076	2195	0.0581802	11582	0.30699	8283	0.219547	202.11	4450	0.108939	2510	0.0614466	12211	0.298934	8789	0.215161	201.339	4422	0.109084
88	Female	53	63	150	Y	Y	N	N	5.13	3.18	4.81	3.97	4.58	4.334	0.69064	0.159354	-18.45	37.03	55.48	193.869	572	0.0152188	752	0.0200079	7216	0.191991	5760	0.153252	195.188	609	0.0159849	771	0.0202371	7325	0.192266	5829	0.152999	195.333	661	0.0173241	828	0.021701	7371	0.193186	5899	0.154606	195.595	599	0.0156571
89	Male	47	66	167	Y	N	Y	N	8.3	6.42	6.23	5.54	4.23	6.144	1.32364	0.215436	-30.33	35.15	65.48	189.708	586	0.0162827	106	0.00294533	8280	0.230069	6829	0.189752	191.333	604	0.016499	113	0.00308673	8350	0.22809	7132	0.194819	187.334	552	0.0157292	99	0.00282099	8140	0.231948	6672	0.190118	191.233	664	0.0181569
90	Female	59	53	151	N	N	Y	N	24.65	24.53	25.9	24.95	22.58	24.522	1.0835	0.0441849	-13.88	33.68	47.56	166.087	1408	0.0510424	917	0.0332428	6312	0.228821	4805	0.17419	168.324	1444	0.0509654	909	0.0320828	6413	0.226344	4833	0.170579	170.553	1502	0.0516358	998	0.0343093	6515	0.223973	4913	0.168899	168.113	1450	0.0513057
91	Male	62	78	169	Y	Y	N	N	5.92	4.95	5.58	3.39	2.83	4.534	1.2166	0.268327	-6.53	30.18	36.71	146.997	835	0.0386429	447	0.0206867	5081	0.235143	3933	0.182015	142.558	868	0.0427107	434	0.0213553	4918	0.241994	3820	0.187966	145.832	787	0.0370057	420	0.0197489	4885	0.229699	3789	0.178164	149.293	991	0.0444626
92	Female	61	49	150	Y	N	Y	N	15.07	14.72	13.23	12.17	10.05	13.048	1.82626	0.139965	-31.28	32.96	64.24	178.037	2211	0.0697539	779	0.0245763	9150	0.288669	6591	0.207937	179.245	2213	0.0688791	818	0.02546	9032	0.281119	6613	0.205828	177.002	2301	0.0734447	756	0.0241305	9019	0.287874	6419	0.204885	181.293	2414	0.0734472
93	Male	76	73	173	N	N	N	N	21.13	20.01	20.53	18.42	16.29	19.276	1.74342	0.090445	-8.33	39.93	48.26	155.261	2237	0.0927986	2116	0.0877791	8127	0.337136	6564	0.272298	155.885	2299	0.0946085	2101	0.0864604	8018	0.329957	7022	0.28897	153.482	2142	0.0909295	2039	0.086557	8328	0.35353	6677	0.283443	155.331	2414	0.100051
94	Male	55	77	175	Y	N	Y	Y	-1.01	-0.58	-2.03	-1.95	-0.99	-1.312	0.575027	0.438283	-30.52	14.43	44.95	170.426	-2058	-0.0708555	-3451	-0.118816	4311	0.148425	3514	0.120985	172.145	-2121	-0.0715734	-3518	-0.118715	4356	0.146994	3418	0.115341	171.223	-2112	-0.0720393	-3350	-0.114267	4123	0.140634	3399	0.115938	171.121	-2123	-0.0725009
95	Female	50	64	152	Y	N	Y	Y	15.48	13.23	14.21	13.2	12.29	13.682	1.08498	0.0792996	-13.97	36.48	50.45	188.915	3332	0.0933624	1569	0.0439633	11315	0.317046	7306	0.204714	187.13	3319	0.0947808	1485	0.0424072	10992	0.313899	7103	0.202841	187.993	3132	0.0886214	1662	0.047027	11223	0.31756	7474	0.21148	189.119	3432	0.0959571
96	Female	45	64	150	Y	N	N	Y	-19.37	-17.79	-17.24	-15.69	-14.29	-16.876	1.74825	0.103594	-28.28	36.53	64.81	149.566	-1648	-0.0736701	-1321	-0.0590523	1146	0.0512294	1288	0.0575771	154.582	-1720	-0.0719798	-1440	-0.0602622	1219	0.0510136	1305	0.0546126	151.283	-1665	-0.0727502	-1229	-0.0536997	1321	0.0577195	1210	0.0528695	150.001	-1583	-0.0703546
97	Male	66	69	164	Y	N	N	Y	9.67	9.55	6.39	5.99	3.95	7.11	2.20298	0.309842	-15.05	27.67	42.72	233.324	-100	-0.00183688	-466	-0.00855987	8660	0.159074	6669	0.122502	231.119	-55	-0.00102965	-485	-0.00907968	8123	0.152071	6569	0.122978	235.184	-123	-0.00222377	-551	-0.00996176	8818	0.159424	7075	0.127912	235.933	-188	-0.00337738
98	Male	46	64	167	N	N	Y	Y	21.33	20.95	20.37	18.87	16.82	19.668	1.65206	0.0839973	-18.12	46.6	64.72	177.099	2796	0.0891466	2719	0.0866916	9096	0.290014	6546	0.20871	171.992	2548	0.0861356	2710	0.0916121	8872	0.29992	6521	0.220444	175.112	2666	0.0869417	2592	0.0845285	8848	0.288545	5921	0.193092	177.992	2951	0.0931469
99	Male	52	63	164	N	N	N	N	24.68	22.13	22.13	20.37	22.37	22.336	1.37445	0.061535	-5.98	32.12	38.1	220.411	3010	0.0619584	2877	0.0592207	13493	0.277742	10384	0.213746	221.095	3044	0.0622711	2718	0.0556022	13190	0.269828	9998	0.204529	223.281	3099	0.062161	2919	0.0585505	13295	0.266677	11002	0.220683	221.005	3119	0.0638574
100	Male	48	72	177	Y	N	Y	N	-6.65	-4.53	-5.23	-4.29	-3.29	-4.798	1.11539	0.23247	-28.55	25.72	54.27	125.228	-435	-0.0277387	-561	-0.0357734	2443	0.155783	2140	0.136462	121.448	-377	-0.02556	-456	-0.0309161	2405	0.163055	2028	0.137495	126.332	-445	-0.0278826	-682	-0.0427324	2543	0.159338	2299	0.14405	123.441	-377	-0.0247413
101	Female	58	64	154	Y	N	Y	N	-5.92	-5.53	-5.92	-5.44	-4.58	-5.478	0.490159	0.0894778	-26.08	26.43	52.51	128.021	-53	-0.0032338	-398	-0.024284	2386	0.145582	2164	0.132037	125.339	-108	-0.00687466	-356	-0.0226609	2291	0.145832	2098	0.133547	130.022	-123	-0.00727564	-451	-0.0266774	2593	0.15338	2299	0.135989	125.331	-133	-0.0084671
102	Male	40	75	176	Y	N	N	N	16.13	14.95	17.45	19.21	18.92	17.332	1.62366	0.0936796	-20.05	36.45	56.5	200.172	2135	0.0532833	385	0.00960847	10861	0.271059	8163	0.203724	205.325	2323	0.0551018	407	0.00965408	11915	0.282625	8243	0.195525	203.003	2211	0.0536517	454	0.0110167	11818	0.286774	8384	0.203445	202.296	2299	0.0561778
103	Male	51	85	173	Y	N	N	N	34.5	32.03	33.23	30.23	29.3	31.858	1.90189	0.0596989	-10.02	37.3	47.32	233.893	5062	0.0925311	4001	0.0731365	16070	0.293752	11430	0.208935	231.789	4897	0.0911474	3825	0.0711944	15889	0.295741	11203	0.20852	235.845	5522	0.0992757	4391	0.0789424	17842	0.320767	12331	0.221689	234.445	5112	0.0930056
104	Female	64	53	153	Y	N	N	Y	41.38	39.18	41.34	40.24	37.49	39.926	1.46306	0.0366443	30.01	39.38	9.37	201.457	4844	0.119355	3716	0.0915611	11202	0.276014	8274	0.203869	198.772	4805	0.121614	3592	0.090913	11132	0.281749	8156	0.206427	204.155	5001	0.119988	3879	0.0930679	12033	0.288705	8281	0.198684	202.335	4991	0.121912
105	Female	67	51	150	N	N	N	N	2.27	1.27	1.97	0.59	1.38	1.496	0.584657	0.390814	-19.63	16.72	36.35	251.645	15	0.000236873	837	0.0132175	9955	0.157204	8557	0.135128	252.188	20	0.000314471	901	0.0141669	9942	0.156324	8513	0.133855	255.913	39	0.000595497	799	0.0122001	10022	0.153028	8771	0.133926	255.138	33	0.000506948
106	Female	55	65	165	Y	Y	N	Y	-13.92	-10.55	-12.13	-10.38	-9.5	-11.296	1.56219	0.138295	-35.02	4.65	39.67	175.283	-1299	-0.0422795	-757	-0.0246386	3153	0.102623	2504	0.0814995	171.583	-1122	-0.0381105	-723	-0.0245578	3188	0.108285	2495	0.0847466	177.552	-1450	-0.0459957	-881	-0.0279463	3433	0.108899	2681	0.0850444	177.551	-1199	-0.0380341
107	Male	73	80	178	N	Y	Y	Y	-4.45	-2.62	-5.23	-2.49	-1.48	-3.254	1.37606	0.422883	-17.75	4.55	22.3	179.402	-1465	-0.045518	-2030	-0.0630727	5318	0.165232	4513	0.14022	177.772	-1402	-0.044363	-1892	-0.059868	5218	0.165112	4454	0.140937	181.291	-1544	-0.046978	-2125	-0.0646556	5577	0.169687	4788	0.145681	181.338	-1552	-0.047197
108	Male	51	63	181	N	N	Y	N	15.1	12.32	14.23	12.3	10.29	12.848	1.67952	0.130722	-19.65	33.28	52.93	186.271	745	0.0214717	1354	0.0390237	8020	0.231145	6340	0.182725	188.375	801	0.0225728	1420	0.0400167	8182	0.230575	6445	0.181625	182.323	661	0.0198847	1002	0.0301429	7871	0.236781	6091	0.183234	185.772	727	0.0210656
109	Male	45	61	168	Y	N	N	N	24.52	20.19	23.84	21.32	20.37	22.048	1.79554	0.0814379	6.65	32.49	25.84	235.17	3723	0.0673177	4410	0.0797397	15185	0.274569	11078	0.200308	233.282	3654	0.0671438	4341	0.0797677	14992	0.275484	10927	0.200788	238.883	3918	0.0686584	4556	0.0798387	15344	0.268886	11299	0.198002	233.481	3661	0.0671578
110	Male	61	62	164	N	N	Y	N	14.32	12.13	11.29	8.92	10.73	11.478	1.76863	0.154089	-24.75	42.08	66.83	181.025	1579	0.0481842	1127	0.0343912	8554	0.261031	6406	0.195483	180.285	1565	0.0481499	1109	0.0341203	8422	0.259117	6320	0.194445	188.223	1705	0.0481259	1333	0.0376257	8767	0.24746	6682	0.188608	183.521	1623	0.0481889
111	Female	67	54	155	Y	Y	N	N	7.37	6.65	5.59	4.99	4.23	5.766	1.12665	0.195396	-11.07	31.57	42.64	166.628	169	0.00608682	-683	-0.0245994	4836	0.174177	3982	0.143419	161.792	150	0.0057303	-643	-0.0245639	4738	0.181001	3848	0.147001	168.119	300	0.0106142	-991	-0.0350623	5212	0.184404	4122	0.145839	164.442	203	0.00750707
112	Female	60	62	154	N	Y	Y	Y	22.5	20.13	23.33	25.42	24.18	23.112	1.77662	0.07687	0.92	46.65	45.73	195.233	2096	0.0549901	1872	0.0491133	8911	0.233787	6552	0.171897	191.293	2001	0.0546826	1850	0.0505561	8653	0.236466	6441	0.176017	199.382	2211	0.0556182	2095	0.0527002	9042	0.227453	6772	0.170351	192.231	1888	0.0510923
113	Male	55	69	174	Y	N	Y	N	4.87	2.88	5.03	4.39	2.38	3.91	1.07779	0.275651	-20.05	18.12	38.17	199.62	655	0.0164374	1699	0.0426369	9335	0.234264	7603	0.190799	205.432	800	0.0189563	1792	0.0424621	9459	0.224135	7718	0.182881	203.322	777	0.0187954	1708	0.0413161	9554	0.231109	8019	0.193978	196.171	655	0.0170205
114	Female	46	49	160	Y	Y	Y	N	11.67	13.94	9.92	7.49	6.93	9.99	2.60934	0.261196	-14.85	19.85	34.7	202.386	260	0.00634764	1478	0.0360839	6912	0.16875	5719	0.139624	201.992	258	0.00632341	1456	0.0356856	6819	0.167129	5677	0.13914	205.509	271	0.00641664	1571	0.0371976	7233	0.17126	5859	0.138727	201.199	277	0.00684271
115	Male	47	74	170	N	N	N	N	8.53	7.42	6.4	5.23	4.6	6.436	1.42687	0.221701	-33.5	17.33	50.83	183.257	1974	0.0587795	892	0.026561	8599	0.256051	6924	0.206175	185.182	1842	0.0537146	838	0.0244369	8423	0.245623	6791	0.198032	188.385	2020	0.0569192	1092	0.0307702	8871	0.249965	7394	0.208347	182.858	1884	0.0563447
116	Female	62	58	159	N	N	N	Y	29.77	26.34	28.81	26.23	24.29	27.088	1.96382	0.0724977	-5.23	37.25	42.48	194.366	4924	0.13034	4122	0.109111	14538	0.384826	9845	0.2606	192.188	4848	0.131253	4059	0.109892	14323	0.387776	9763	0.26432	199.325	5545	0.139565	4323	0.108808	15381	0.387134	10092	0.254012	192.133	4776	0.129378
117	Male	40	78	166	N	N	Y	N	1.08	2.93	0.52	1.29	3.44	1.852	1.12871	0.609452	-37.13	8.07	45.2	220.819	808	0.0165706	203	0.00416316	10061	0.206333	8316	0.170546	222.332	885	0.0179036	232	0.00469336	11092	0.224391	8450	0.170944	223.37	899	0.0180181	321	0.00643362	11233	0.225137	8841	0.177195	221.221	883	0.018043
118	Female	55	60	151	Y	Y	Y	Y	19.58	17.18	17.32	14.29	12.75	16.224	2.41607	0.148919	-23.8	33.6	57.4	171.493	1375	0.046753	1304	0.0443389	7187	0.244374	5920	0.201293	173.995	1579	0.0521565	1492	0.0492828	7823	0.258404	6032	0.199245	177.992	1555	0.0490828	1499	0.0473152	9821	0.309995	7710	0.243362	174.226	1344	0.0442765
119	Female	60	56	159	N	Y	N	Y	13.67	12.57	14.63	13.97	11.33	13.234	1.16161	0.0877749	5.83	28.78	22.95	165.076	1340	0.0491742	768	0.0281834	5587	0.205027	4661	0.171045	166.299	1420	0.0513463	805	0.0291083	5658	0.20459	4872	0.176168	164.229	1331	0.049349	710	0.0263244	5412	0.200659	4550	0.168699	166.231	1455	0.0526549
120	Male	54	79	168	Y	Y	Y	N	-19.02	-18.93	-21.33	-20.49	-18.39	-19.632	1.09811	0.0559349	-24.1	-9.37	14.73	155.293	-2018	-0.0836792	-3050	-0.126472	1544	0.0640241	1696	0.070327	156.922	-2219	-0.0901135	-3132	-0.12719	1844	0.0748847	1789	0.0726512	152.388	-1999	-0.0860818	-2883	-0.124149	1421	0.0611917	1785	0.0768664	156.002	-2211	-0.0908507
121	Female	73	52	165	Y	Y	N	N	26.02	25.33	23.14	20.19	23.47	23.63	2.03477	0.0861095	-31.15	48.73	79.88	166.973	1376	0.0493544	2340	0.0839312	7205	0.258429	4823	0.172991	170.123	1442	0.0498241	2552	0.0881769	7765	0.268297	5193	0.179429	162.384	1299	0.0492632	2424	0.0919276	7127	0.270284	5083	0.192767	168.02	1405	0.0497685
122	Female	70	59	162	Y	Y	N	N	14.67	12.12	12.23	11.23	8.44	11.738	2.00597	0.170895	-12.03	31.4	43.43	203.541	1067	0.0257549	380	0.00917233	9007	0.217408	6588	0.159019	207.292	1213	0.028229	420	0.00977427	9532	0.221829	6871	0.159902	201.488	881	0.0217009	375	0.00923704	881	0.0217009	6332	0.155971	202.185	993	0.0242913
123	Male	63	74	173	Y	N	N	N	33.15	32.19	30.62	34.23	36.48	33.334	1.9702	0.0591049	-3.63	34.25	37.88	171.094	2269	0.0775113	2466	0.084241	9814	0.335256	7639	0.260956	169.253	2121	0.0740403	2391	0.0834655	9543	0.333129	7281	0.254166	170.084	2125	0.0734568	2331	0.0805778	9159	0.316607	7442	0.257254	172.331	2345	0.0789616
1	Male	21	70	161	N	N	N	N	-8.95	-7.04	-6.68	-9.13	-8.23	-8.006	0.989557	0.123602	-16.37	8.33	24.7	135.44	-124	-0.00675971	-359	-0.0195704	5187	0.282763	3634	0.198103	133.29	-120	-0.00675439	-339	-0.0190812	5092	0.286611	3548	0.199705	132.194	-99	-0.00566515	-348	-0.0199139	5008	0.286577	3538	0.202458	131.399	-155	-0.00897734
2	Female	52	48	158	N	Y	Y	N	27.25	24.18	22.93	25.67	24.98	25.002	1.447	0.0578755	-13.7	30.05	43.75	204.96	5756	0.13702	5270	0.12545	20700	0.492756	12943	0.308104	201.44	5598	0.137956	5139	0.126645	19937	0.491324	12348	0.304302	205.277	5811	0.137902	5331	0.126511	20811	0.49387	13004	0.3086	205.991	6332	0.149226
3	Female	36	48	163	Y	N	N	N	18.8	16.55	16.42	14.92	13.23	15.984	1.8524	0.115891	-31.02	18.35	49.37	230.84	-886	-0.0166269	1242	0.0233077	8286	0.155497	5013	0.0940753	231.92	-913	-0.0169744	1392	0.0258799	8552	0.158998	5283	0.098221	231.221	-901	-0.0168527	1304	0.0243906	8333	0.155864	5092	0.0952432	233.123	-884	-0.016266
4	Male	25	74	177	Y	N	N	N	-1.43	0.13	-2.25	-1.18	-0.32	-1.01	0.83888	0.830574	-23.15	12.15	35.3	137.38	-1764	-0.0934655	-1732	-0.09177	1464	0.07757	1257	0.0666022	135.921	-1662	-0.0899618	-1829	-0.0990012	1523	0.0824379	1331	0.0720452	136.187	-1665	-0.0897724	-1599	-0.0862139	1532	0.0826014	1188	0.0640538	134.931	-1413	-0.0776102
5	Male	66	65	166	N	N	N	N	10.95	8.83	13.21	12.97	10.73	11.338	1.61109	0.142097	-26.58	10.63	37.21	182.46	5171	0.155324	6071	0.182358	11487	0.345041	7586	0.227865	183.55	5239	0.155503	6219	0.184592	11929	0.354075	7629	0.226443	183.564	5282	0.156756	6127	0.181833	12032	0.357078	7495	0.222432	181.23	5099	0.155248
6	Male	32	81	162	N	N	Y	N	6.72	5.51	7.94	6.23	4.92	6.264	1.03855	0.165796	-19.23	13.2	32.43	170.88	1012	0.0346576	826	0.0282877	6605	0.226199	5337	0.182774	175.33	1133	0.0368568	959	0.0311965	7023	0.22846	5492	0.178656	172.954	992	0.0331627	833	0.0278473	6705	0.224149	5432	0.181593	171.233	995	0.033935
7	Male	53	79	179	Y	Y	Y	N	9.93	7.42	11.02	8.99	5.39	8.55	1.97289	0.230747	-5.97	19.85	25.82	167.6	662	0.0235673	346	0.0123177	7352	0.261732	4928	0.175438	171.95	752	0.0254339	423	0.0143066	7879	0.266481	5429	0.183618	168.299	677	0.0239015	351	0.0123921	7432	0.262387	5008	0.176808	171.844	776	0.026278
8	Male	42	79	180	Y	N	Y	N	1.77	0.15	2.42	2.05	0.99	1.476	0.812591	0.550536	-24.78	24.05	48.83	225.535	-960	-0.0188731	-1150	-0.0226084	9889	0.194413	6558	0.128927	222.937	-927	-0.0186516	-1058	-0.0212873	9775	0.196676	6421	0.129193	221.993	-858	-0.0174104	-1092	-0.0221587	9772	0.198292	6551	0.132932	224.198	-884	-0.0175869
9	Male	43	74	165	Y	Y	Y	Y	4.45	2.82	6.23	4.55	6.23	4.856	1.27902	0.263391	-17.15	14.9	32.05	190.633	-1022	-0.0281226	-1210	-0.0332958	5912	0.162682	3759	0.103437	192.973	-1137	-0.0305329	-1374	-0.0368972	6092	0.163594	3834	0.102958	191.135	-1084	-0.0296721	-1321	-0.0361595	6033	0.16514	3817	0.104482	192.333	-1055	-0.0285197
10	Male	63	65	164	N	N	N	N	10.02	9.75	8.85	6.34	4.92	7.976	2.00522	0.251407	-14.47	38.08	52.55	175.841	843	0.0272639	1379	0.0445989	6470	0.209249	4749	0.15359	180.366	842	0.0258823	1475	0.0453401	6623	0.203585	4878	0.149945	177.781	895	0.0283173	1405	0.0444535	6551	0.20727	4844	0.153262	178.939	919	0.0287016
11	Male	51	67	165	Y	N	N	N	17.43	14.93	15.39	14.29	15.32	15.472	1.05399	0.0681224	-6.85	27.37	34.22	150.416	1355	0.0598896	810	0.0358011	6921	0.305901	5107	0.225724	152.335	1420	0.0611912	910	0.0392141	7023	0.302638	5293	0.228088	151.344	1491	0.0650949	821	0.0358437	7005	0.305828	5127	0.223838	155.384	1556	0.0644462
12	Female	40	54	148	Y	N	Y	N	14.33	12.14	12.37	13.07	12.44	12.87	0.792389	0.0615687	-20.65	26.13	46.78	186.39	992	0.028554	578	0.0166373	7019	0.202037	4528	0.130335	184.23	913	0.0268999	552	0.0162637	6785	0.199908	4429	0.130492	188.293	1010	0.0284874	601	0.0169514	7102	0.200314	4610	0.130027	187.994	1201	0.0339825
13	Female	38	59	152	N	N	N	N	6.57	5.58	6.44	5.57	4.55	5.742	0.72794	0.126775	-41.67	33.73	75.4	171.732	-76	-0.00257698	287	0.00973149	6780	0.229894	4308	0.146074	169.33	-103	-0.00359227	225	0.0078472	6211	0.216618	4193	0.146237	172.388	-88	-0.00296121	299	0.0100614	6881	0.231546	4401	0.148094	172.113	-190	-0.00641396
14	Female	42	48	156	Y	Y	Y	N	3.48	2.21	5.08	4.12	2.88	3.554	0.991476	0.278975	-17.75	28.7	46.45	198.404	-305	-0.00774817	512	0.0130068	6529	0.165862	5961	0.151432	189.923	-294	-0.00815065	485	0.0134458	6333	0.175572	5923	0.164205	200.136	-333	-0.00831369	521	0.0130073	6798	0.169719	6002	0.149846	197.112	-255	-0.00656318
15	Female	46	57	151	Y	N	N	Y	21.48	19.17	22.25	20.19	19.1	20.438	1.25129	0.0612239	-20.58	50.28	70.86	173.254	-529	-0.0176234	624	0.0207883	7011	0.233568	3664	0.122064	177.696	-499	-0.0158032	584	0.0184951	7172	0.227135	3821	0.12101	175.384	-554	-0.0180107	644	0.0209366	7172	0.233163	3705	0.12045	174.381	-600	-0.0197312
16	Female	63	60	148	Y	N	Y	Y	6.63	5.57	9.91	7.52	6.23	7.172	1.50767	0.210216	-28.1	39.88	67.98	141.691	-262	-0.0130502	230	0.0114563	4102	0.20432	2243	0.111724	144.392	-359	-0.017219	393	0.0188498	4293	0.205909	2345	0.112475	142.997	-288	-0.0140844	249	0.0121771	4232	0.206963	2331	0.113996	145.983	-405	-0.0190042
17	Male	52	83	181	Y	N	N	N	-0.93	-2.25	-0.55	0.23	1.29	-0.442	1.18068	2.67123	-23.73	14.5	38.23	179.869	-1010	-0.0312183	-684	-0.0211419	6082	0.18799	4277	0.132199	177.834	-992	-0.0313677	-693	-0.0219131	5773	0.182546	4923	0.155668	183.295	-1102	-0.0328005	-744	-0.0221448	6543	0.194749	4310	0.128285	180.929	-1132	-0.0345804
18	Female	48	58	149	Y	N	Y	N	-1.25	0.81	-0.57	-0.52	-1.23	-0.552	0.74877	1.35647	-26.45	31.5	57.95	179.234	-833	-0.0259301	-1289	-0.0401247	3266	0.101666	2816	0.0876581	181.231	-932	-0.028376	-1352	-0.0411634	3311	0.100808	2929	0.0891773	181.003	-899	-0.0274403	-1305	-0.0398326	3322	0.101398	2918	0.0890664	182.342	-995	-0.0299261
19	Male	52	62	166	N	N	N	N	-16.17	-15.32	-14.47	-12.92	-10.58	-13.892	1.97366	0.142072	-19.25	-1.82	17.43	162.364	-2166	-0.0821635	-2227	-0.0844774	1936	0.0734389	1539	0.0583793	160.429	-1888	-0.0733561	-2039	-0.079223	1983	0.0770472	1495	0.0580865	164.288	-2233	-0.0827327	-2323	-0.0860672	2005	0.0742853	1649	0.0610955	167.912	-2324	-0.0824276
20	Female	50	63	148	Y	N	Y	Y	3.1	2.05	2.55	3.59	2.95	2.848	0.519631	0.182455	-27.18	22.12	49.3	164.247	-343	-0.0127145	-1591	-0.058976	3768	0.139674	2970	0.110093	165.556	-492	-0.0179504	-1623	-0.0592146	3939	0.143713	3042	0.110986	162.382	-298	-0.0113016	-1492	-0.0565839	3666	0.139033	2823	0.107062	162.332	-282	-0.0107014
21	Female	46	59	148	Y	N	N	Y	22.28	20.03	21.38	18.87	17.75	20.062	1.63853	0.0816732	-21.57	47.45	69.02	186.936	188	0.00537987	339	0.00970094	5738	0.164201	3780	0.10817	188.583	205	0.00576433	319	0.00896986	5651	0.158899	3592	0.101002	187.295	207	0.0059009	344	0.00980632	5859	0.167021	4021	0.114626	184.231	156	0.0045962
22	Female	48	51	160	Y	N	N	N	8.98	6.68	6.23	5.3	3.47	6.132	1.79997	0.293537	-33.75	34.77	68.52	193.68	464	0.0123694	-592	-0.0157816	5623	0.149899	3801	0.101328	191.234	455	0.0124417	-424	-0.0115941	5249	0.143531	3592	0.0982214	194.555	505	0.0133416	-613	-0.0161948	5879	0.155317	3918	0.103509	191.113	455	0.0124575
23	Female	42	62	163	Y	Y	Y	N	5.37	4.21	7.3	7.21	6.23	6.064	1.16512	0.192137	-36.17	43.35	79.52	205.934	-101	-0.00238158	-88	-0.00207504	5052	0.119126	3902	0.0920092	209.121	-144	-0.00329281	-103	-0.00235528	5232	0.119639	4103	0.0938223	210.123	-188	-0.00425805	-134	-0.00303499	5535	0.125363	4033	0.0913442	202.581	-55	-0.00134019
24	Female	41	52	165	N	N	N	Y	13.28	15.15	12.17	10.53	9.95	12.216	1.88255	0.154105	-29.98	42.95	72.93	150.376	532	0.0235264	-266	-0.0117632	5654	0.250034	4396	0.194402	153.293	593	0.0252354	-288	-0.012256	5823	0.2478	4450	0.189372	148.823	501	0.0226203	-233	-0.01052	5451	0.246114	4122	0.186109	148.885	499	0.0225112
25	Female	44	64	162	Y	N	N	N	10.45	12.23	7.19	7.3	5.62	8.558	2.4145	0.282134	-34.6	30.08	64.68	169.189	272	0.00950221	-366	-0.0127861	5792	0.202341	3950	0.137992	165.82	301	0.0109469	-384	-0.0139655	5992	0.21792	4039	0.146893	173.323	305	0.0101528	-481	-0.0160115	5929	0.197365	4143	0.137912	167.959	250	0.00886203
26	Female	47	52	155	N	N	N	Y	9.78	8.23	7.79	9.13	10.39	9.064	0.958532	0.105752	-16.07	38.83	54.9	174.04	337	0.0111258	458	0.0151205	5204	0.171806	4062	0.134104	177.923	388	0.0122565	526	0.0166158	5549	0.175287	4429	0.139908	171.299	307	0.0104623	445	0.0151653	5153	0.175611	3888	0.1325	172.91	331	0.011071
27	Male	52	61	164	Y	Y	N	N	13.87	10.38	14.52	12.12	13.84	12.946	1.50978	0.116621	-14.73	21.1	35.83	215.557	-223	-0.00479933	-42	-0.00090391	8302	0.178673	6388	0.13748	212.183	-185	-0.00410914	-20	-0.000444231	8056	0.178936	6219	0.138134	212.337	-198	-0.00439151	-55	-0.00121986	8493	0.188369	6477	0.143656	211.124	-119	-0.00266976
28	Male	45	64	173	N	N	Y	N	26,68	24.55	27.03	25.01	22.85	24.86	1.48893	0.0598924	-19.48	36.18	55.66	173.349	1728	0.0575044	606	0.0201665	8994	0.299302	6072	0.202064	175.933	1889	0.0610292	781	0.0252323	9231	0.298232	6621	0.213909	175.583	1883	0.0610781	767	0.0248789	9192	0.298157	6543	0.212233	172.339	1666	0.0560929
29	Female	39	56	160	Y	Y	N	N	15.47	14.63	14.33	12.98	11.93	13.868	1.25737	0.0906669	-20.13	26.87	47	183.981	224	0.00661762	370	0.0109309	5463	0.161393	4306	0.127212	188.329	258	0.0072742	412	0.0116162	5656	0.159469	4430	0.124902	188.338	254	0.00716074	381	0.0107411	5592	0.157649	4402	0.124101	182.991	214	0.00639079
30	Male	29	69	171	Y	Y	Y	Y	-11.35	-9.98	-7.88	-5.81	-4.22	-7.848	2.61252	0.33289	-40.1	0.48	40.58	166.111	-216	-0.00782811	-640	-0.0231944	3304	0.119741	3255	0.117965	165.999	-188	-0.00682255	-432	-0.0156774	3410	0.123749	2993	0.108616	162.929	-313	-0.0117909	-745	-0.0280646	3402	0.128156	3331	0.125481	170.221	-331	-0.0114236
31	Male	70	75	175	N	N	N	Y	11.78	14.1	12.32	10.35	13.94	12.498	1.40049	0.112057	-22.83	28.75	51.58	186.124	255	0.00736098	-75	-0.00216499	6662	0.192309	5192	0.149875	185.234	208	0.00606208	-66	-0.00192355	6321	0.184223	5011	0.146044	188.959	301	0.00843007	-183	-0.00512526	7082	0.198345	5544	0.15527	188.955	304	0.00851445
32	Female	43	65	148	N	N	Y	Y	-14.45	-12.33	-13.23	-10.95	-7.99	-11.79	2.21749	0.188083	-38.02	23.97	61.99	108.908	-280	-0.0236069	-768	-0.0647503	1624	0.13692	1320	0.11129	105.54	-234	-0.0210079	-677	-0.0607791	1523	0.136731	1199	0.107643	109.292	-331	-0.0277109	-801	-0.0670588	1754	0.146843	1440	0.120555	109.332	-350	-0.0292802
33	Male	49	79	163	Y	N	N	N	33.57	31.63	33.17	30.63	31.94	32.188	1.06531	0.0330967	-8.47	52.95	61.42	165.303	5811	0.212662	4422	0.161829	13083	0.478791	9639	0.352753	168.88	6023	0.211182	4593	0.161042	13329	0.467349	9972	0.349644	164.231	6033	0.223678	4549	0.168658	14992	0.555839	9790	0.362971	162.999	5677	0.213673
34	Male	62	72	170	N	Y	N	N	16.85	14.78	18.24	16.29	14.29	16.09	1.42802	0.088752	-10.95	33.67	44.62	182.258	2528	0.0761034	2122	0.0638811	8061	0.24267	6527	0.19649	181.925	2495	0.0753851	2093	0.0632389	7788	0.23531	6423	0.194068	183.292	2717	0.0808728	2322	0.0691155	8918	0.265449	6677	0.198744	183.113	2491	0.0742909
35	Male	60	62	173	N	N	N	N	24.12	23	21.22	20.38	20.03	21.75	1.56816	0.0720992	-14	61.53	75.53	222.805	5546	0.11172	1131	0.0227831	16610	0.334595	11937	0.240461	225.339	5823	0.114676	1230	0.0242232	17749	0.349543	12231	0.240874	224.193	5152	0.102502	1321	0.026282	17720	0.352549	12123	0.241194	220.554	5414	0.111298
36	Female	65	58	160	Y	Y	N	Y	7.45	5.24	7.13	5.23	4.93	5.996	1.06721	0.177988	-27.95	27.47	55.42	173.416	-1408	-0.0468192	-1608	-0.0534697	3390	0.112725	2390	0.079473	171.955	-1342	-0.0453861	-1512	-0.0511355	3293	0.111368	2259	0.0763988	175.232	-1501	-0.0488826	-1702	-0.0554284	3430	0.111704	2414	0.0786159	172.911	-1355	-0.0453204
37	Male	60	73	169	Y	N	N	Y	-1.95	-0.04	-0.12	-0.58	-0.32	-0.602	0.699325	1.16167	-20.31	23.34	43.65	224.84	-3876	-0.076672	2013	0.0398196	7815	0.15459	6872	0.135936	221.338	-3523	-0.0719119	1842	0.0375991	7123	0.145396	6423	0.131107	223.193	-3559	-0.0714442	2213	0.0444243	8018	0.160955	7032	0.141162	225.091	-4001	-0.0789682
38	Male	47	65	176	Y	Y	N	N	-5.4	-3.24	-2.99	-1.93	-2.83	-3.278	1.14935	0.350627	-32.37	7.77	40.14	155.081	-477	-0.0198336	-1585	-0.065904	4164	0.173138	3471	0.144324	151.395	-388	-0.0169281	-1423	-0.0620843	4021	0.175433	3231	0.140966	153.199	-433	-0.0184491	-1522	-0.0648489	4232	0.180316	3311	0.141074	156.332	-558	-0.0228317
39	Female	44	49	151	N	N	N	N	6.85	6.42	5.58	4.23	2.45	5.106	1.60091	0.313535	-22.63	30.13	52.76	217.8	2085	0.0439532	2212	0.0466304	8582	0.180914	7594	0.160087	215.236	1992	0.0429991	2145	0.0463018	8133	0.175558	7260	0.156714	214.929	1988	0.0430354	2093	0.0453084	8382	0.18145	7442	0.161102	215.299	1993	0.0429955
40	Female	35	51	155	Y	N	Y	Y	-2.03	-0.55	-3.42	-2.88	-1.38	-2.052	1.02617	0.500081	-39.23	48.68	87.91	164.012	-1442	-0.0536061	-1564	-0.0581414	2759	0.102565	2404	0.0893682	162.398	-1555	-0.0589616	-1602	-0.0607437	2981	0.113032	2593	0.0983198	165.881	-1552	-0.0564025	-1602	-0.0582196	2838	0.103138	2551	0.092708	162.933	-1294	-0.0487434
41	Female	54	55	148	Y	Y	Y	Y	6.87	5.93	5.88	4.66	4.23	5.514	0.95118	0.172503	-39.78	25.52	65.3	225.282	134	0.00264029	79	0.00155659	7589	0.149531	6420	0.126498	228.384	205	0.00393027	109	0.00208975	7859	0.150673	6621	0.126938	228.188	188	0.00361054	132	0.00253506	8052	0.154639	6533	0.125466	222.913	110	0.00221372
42	Male	56	68	168	N	Y	N	N	-3.48	-2.99	-1.98	-0.95	-1.33	-2.146	0.960804	0.447718	-19.88	15.28	35.16	138.051	720	0.0377793	-392	-0.0205687	4428	0.232342	3315	0.173942	132.313	616	0.0351865	-280	-0.0159938	3529	0.20158	3019	0.172448	135.583	717	0.039004	-402	-0.0218683	4249	0.231141	3305	0.179788	140.299	883	0.0448592
43	Male	45	67	169	N	N	N	N	16.28	14.13	15.58	13.53	15.23	14.95	0.993277	0.06644	-20.23	31.35	51.58	242.638	2249	0.0382007	2474	0.0420225	11713	0.198953	9191	0.156115	238.159	2129	0.0375355	2330	0.0410792	11123	0.196105	8979	0.158305	243.198	2344	0.0396312	2501	0.0422857	12039	0.20355	9399	0.158914	240.199	2144	0.0371606
44	Female	44	49	151	N	N	Y	Y	12.15	10.23	11.92	10.42	9.91	10.926	0.922921	0.0844702	-19.25	19.85	39.1	207.07	-724	-0.0168851	-614	-0.0143197	6300	0.146929	5274	0.123	201.323	-655	-0.0161605	-556	-0.0137179	6178	0.152427	5132	0.126619	210.092	-844	-0.0191216	-705	-0.0159724	6644	0.150526	5320	0.120529	205.551	-669	-0.0158339
45	Male	64	79	165	Y	N	N	N	7.77	6.32	5.93	9.19	7.79	7.4	1.16794	0.15783	-22.48	36.73	59.21	188.884	1593	0.0446504	2127	0.059618	8378	0.234828	6156	0.172547	182.359	1415	0.0425502	2088	0.0627879	8281	0.249017	6094	0.183252	191.939	1662	0.0451133	2258	0.0612911	8818	0.239356	6692	0.181648	190.291	1737	0.0479693
46	Male	60	78	174	Y	Y	N	N	7.9	9.83	8.92	6.32	5.3	7.654	1.65645	0.216416	-23.68	13.53	37.21	217.706	750	0.0158242	-898	-0.0189468	10356	0.2185	7464	0.157482	214.331	723	0.0157387	-854	-0.0185904	9928	0.216118	7317	0.159281	215.883	702	0.0150626	-881	-0.0189034	11029	0.236646	7242	0.155389	215.554	688	0.0148073
47	Female	51	59	159	Y	N	Y	N	-7.9	-5.65	-6.55	-4.99	-3.95	-5.808	1.34709	0.231937	-32.88	20.72	53.6	175.385	-1330	-0.0432381	2590	0.0842005	2724	0.0885569	2037	0.0662226	177.188	-1429	-0.045516	2611	0.0831646	2834	0.0902675	2213	0.0704876	177.283	-1445	-0.0459763	2699	0.0858754	2858	0.0909344	2133	0.0678667	178.293	-1442	-0.0453625
48	Female	44	52	159	Y	N	Y	N	-0.4	0.24	1.12	2.25	1.22	0.886	0.905309	1.02179	-28.2	29.23	57.43	141.152	-716	-0.0359368	-961	-0.0482336	3026	0.151878	2607	0.130848	143.332	-806	-0.0392327	-1010	-0.0491626	3129	0.152307	2688	0.130841	144.992	-881	-0.0419071	-1025	-0.0487569	3318	0.15783	2899	0.137899	144.383	-855	-0.0410142
49	Male	29	64	171	Y	N	N	N	4.55	3.18	3.94	3.21	2.48	3.472	0.7098	0.204435	-31.23	31.13	62.36	192.837	-1783	-0.047948	-2244	-0.0603451	4273	0.114909	3756	0.101005	191.658	-1618	-0.0440478	-2155	-0.0586669	4199	0.114312	3650	0.0993663	193.929	-1882	-0.0500419	-2331	-0.0619807	4310	0.114602	3805	0.101174	197.994	-1932	-0.0492837
50	Male	56	81	176	N	Y	N	Y	13.98	10.95	12.55	14.29	15.38	13.43	1.53424	0.114239	-13.6	40.08	53.68	178.084	1841	0.0580502	1212	0.0382167	7580	0.239012	5600	0.176579	179.956	1902	0.0587324	1233	0.0380742	7892	0.243699	5733	0.177031	181.293	1905	0.0579606	1333	0.0405572	7711	0.234611	5651	0.171935	177.921	1781	0.0562613
51	Female	64	61	158	Y	N	Y	N	21.75	18.99	20.15	18.85	16.23	19.194	1.81065	0.0943343	0.52	45.37	44.85	157.965	870	0.0348656	910	0.0364686	8683	0.347975	6181	0.247706	161.293	919	0.0353252	1044	0.04013	8856	0.340413	6322	0.24301	155.296	861	0.0357012	919	0.0381061	8778	0.363978	6723	0.278768	158.848	899	0.0356284
52	Male	63	80	169	Y	N	Y	Y	7.92	6.94	8.85	6.29	5.29	7.058	1.23967	0.17564	-16.35	16.8	33.15	191.269	-318	-0.00869236	-821	-0.0224416	6064	0.165756	5057	0.13823	193.221	-385	-0.0103122	-992	-0.0265707	6022	0.161299	5151	0.137969	188.875	-255	-0.00714811	-717	-0.0200988	5577	0.156333	4981	0.139626	190.021	-335	-0.00927773
53	Male	46	68	165	Y	N	N	N	16.8	14.95	15.23	15.03	14.33	15.268	0.822931	0.0538991	-17.13	23.83	40.96	217.702	988	0.0208464	994	0.020973	11969	0.252542	8521	0.17979	215.545	996	0.021438	1028	0.0221267	11318	0.243609	8607	0.185258	215.505	991	0.0213383	873	0.0187975	12304	0.26493	8281	0.178307	215.488	1083	0.0233229
54	Male	60	67	171	Y	Y	N	N	5.92	5.85	4.55	4.19	5.38	5.178	0.694763	0.134176	-9.78	23.18	32.96	209.153	-2010	-0.0459481	-657	-0.0150189	5559	0.127077	4869	0.111304	205.432	-1928	-0.0456847	-558	-0.013222	5328	0.126249	4671	0.110681	211.032	-2299	-0.0516229	-848	-0.0190414	5991	0.134525	5020	0.112722	205.181	-1777	-0.0422098
55	Male	52	85	174	Y	Y	Y	N	21.02	24.19	22.13	20.18	17.92	21.088	2.07718	0.0985008	-15.22	29.9	45.12	138.224	-126	-0.00659483	285	0.0149169	4644	0.243067	3076	0.160998	135.149	-88	-0.00481789	256	0.0140157	4533	0.248176	2918	0.159757	135.585	-216	-0.0117498	399	0.0217045	4919	0.26758	3371	0.183373	135.394	-129	-0.00703705
56	Male	48	71	174	Y	N	N	Y	5.85	4.51	5.21	4.38	2.99	4.588	0.957338	0.208661	-38.48	17.47	55.95	146.25	-389	-0.0181869	-547	-0.0255738	4369	0.204263	3137	0.146664	148.137	-345	-0.0157214	-499	-0.0227391	4256	0.193943	3091	0.140855	145.841	-293	-0.0137755	-455	-0.021392	4111	0.193281	2983	0.140247	145.113	-355	-0.0168584
57	Male	74	72	164	N	N	N	Y	21,17	19.21	17.35	14.27	12.3	15.7825	2.6749	0.169485	-10.96	23.62	34.58	145.031	863	0.0410288	993	0.0472093	5817	0.276552	4356	0.207093	144.991	855	0.0406709	971	0.0461888	5699	0.271092	4391	0.208873	141.336	993	0.04971	732	0.0366442	5913	0.296007	4682	0.234383	144.921	858	0.0408531
58	Male	74	70	179	Y	Y	N	Y	-7.75	-6.23	-5.55	-3.59	-2.3	-5.084	1.9298	0.379584	-16.54	24.31	40.85	170.106	-1788	-0.0617914	-3380	-0.116809	1981	0.0684613	1735	0.0599598	172.853	-1705	-0.0570651	-3312	-0.11085	1904	0.0637255	1689	0.0565296	165.849	-1800	-0.0654405	-3544	-0.128845	2021	0.0734752	1888	0.0686398	167.959	-1551	-0.0549801
59	Female	68	48	164	Y	Y	N	N	18.22	15.94	14.97	11.37	13.48	14.796	2.30357	0.155689	-14.8	33.47	48.27	139.943	1220	0.0622956	1798	0.0918094	4722	0.241115	3990	0.203737	141.842	1399	0.0695357	1805	0.0897155	4833	0.240219	4005	0.199064	140.099	1310	0.0667423	1818	0.0926241	4545	0.23156	4029	0.205271	140.331	1313	0.0666741
60	Male	56	75	161	Y	Y	Y	Y	2.38	1.02	1.88	0.35	2.38	1.602	0.79926	0.498914	-26.77	16.05	42.82	163.954	505	0.0187866	570	0.0212046	5426	0.201853	4599	0.171088	162.929	501	0.018873	513	0.019325	5538	0.20862	4287	0.161494	164.927	601	0.0220948	599	0.0220213	5566	0.204625	4981	0.183119	166.199	661	0.0239301
61	Female	53	57	148	N	Y	Y	Y	-6.9	-4.66	-5.96	-4.23	-2.94	-4.938	1.37583	0.27862	-32.68	18.67	51.35	144.358	-354	-0.0169872	-530	-0.0254328	2656	0.127452	2349	0.11272	145.192	-381	-0.0180734	-552	-0.0261851	2702	0.128174	2418	0.114702	145.222	-331	-0.0156951	-551	-0.0261268	2717	0.128832	2495	0.118306	145.138	-401	-0.0190363
62	Male	61	70	181	Y	N	N	Y	12.4	10.53	11.23	7.95	6.94	9.81	2.04643	0.208607	-18.48	32.78	51.26	180.136	694	0.0213874	888	0.027366	5789	0.178403	4482	0.138125	183.292	715	0.0212823	913	0.0271759	6009	0.178861	4542	0.135195	183.291	883	0.0262832	904	0.0269083	5618	0.167224	4592	0.136685	179.321	721	0.0224219
63	Female	50	53	151	Y	Y	N	N	3.9	2.95	2.84	4.23	2.95	3.374	0.575173	0.170472	-11.73	32.52	44.25	189.974	-1209	-0.0334995	-1175	-0.0325574	4588	0.127126	3958	0.10967	188.854	-1195	-0.0335055	-1205	-0.0337858	4349	0.121937	3718	0.104245	192.399	-1308	-0.0353348	-1222	-0.0330115	4888	0.132046	4009	0.1083	188.332	-1122	-0.0316333
64	Female	50	51	165	Y	N	N	Y	8.15	9.97	6.23	5.53	4.29	6.834	2.00517	0.293411	-26.85	19.93	46.78	172.885	490	0.0163939	991	0.0331558	5313	0.177756	4713	0.157682	173.294	458	0.015251	912	0.0303688	5212	0.173555	4657	0.155074	173.291	501	0.0166834	1039	0.034599	5444	0.181287	4818	0.160441	174.485	499	0.0163902
65	Female	68	52	151	Y	Y	Y	Y	0.58	1.37	0.99	0.29	1.39	0.924	0.433756	0.469433	-18.17	31.18	49.35	202.475	-1221	-0.0297833	-1285	-0.0313444	5657	0.137989	4212	0.102741	201.388	-1199	-0.0295632	-1105	-0.0272455	5750	0.141775	4008	0.0988236	205.199	-1493	-0.0354576	-1522	-0.0361463	6442	0.152993	4512	0.107157	202.841	-1301	-0.0316203
66	Male	74	78	181	Y	N	N	Y	-0.28	-1.32	-2.04	-0.5	-0.33	-0.894	0.684853	0.766055	-26.48	14.53	41.01	173.234	556	0.0185271	-1048	-0.0349217	9036	0.301099	6724	0.224059	171.182	535	0.0182573	-992	-0.0338529	8984	0.306587	6698	0.228575	171.223	455	0.0155198	-881	-0.0300505	8665	0.295559	6160	0.210115	174.221	661	0.0217771
67	Male	61	79	174	Y	N	Y	N	4.5	6.59	3.4	4.94	2.38	4.362	1.42625	0.326971	-7	29.57	36.57	168.858	116	0.00406832	208	0.00729491	5556	0.194858	3648	0.127942	166.195	94	0.00340324	188	0.00680647	5523	0.199958	3549	0.12849	170.102	109	0.0037671	331	0.0114396	5650	0.195267	4092	0.141422	167.885	91	0.00322862
68	Female	73	51	160	Y	N	N	Y	-2.68	-1.22	-3.05	-0.29	-1.22	-1.692	1.02289	0.604543	-25.53	11.7	37.23	222.524	-3379	-0.0682393	-2160	-0.0436214	5104	0.103076	5002	0.101016	220.852	-3217	-0.0659551	-2003	-0.0410656	4959	0.10167	4821	0.0988404	222.933	-3139	-0.0631601	-2005	-0.0403428	4771	0.0959977	5201	0.10465	220.919	-3213	-0.0658331
[truncated: 49 more columns]
